# Supplementary material for: Alien Plant Invasions of the Natural Habitat in the Western Region of Saudi Arabia: Floristic Diversity and Vegetation Structure
Source: MDPI journal article supplement (doi:10.3390/d15030309), 2023-02-21

**(a)**

Abha [Lat: 18.23, Lon: 42.66] (2093 m)  
1989 to 2017 19.3C 212 mm

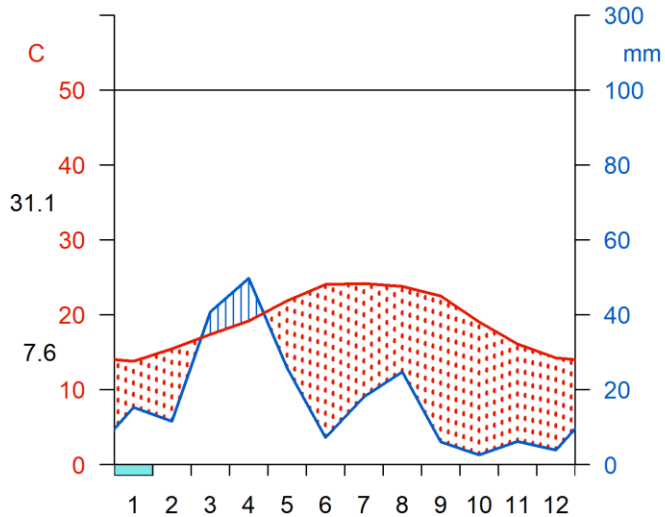**(b)**

Makkah [Lat: 21.43, Lon: 39.76] (240 m)  
1989 to 2017 31.6C 103 mm

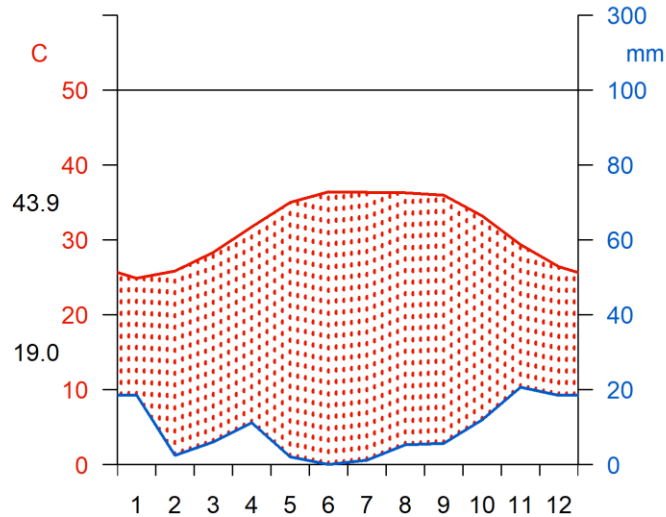**(c)**

Madinah [Lat: 24.54, Lon: 39.69] (635 m)  
1989 to 2017 28.5C 59 mm

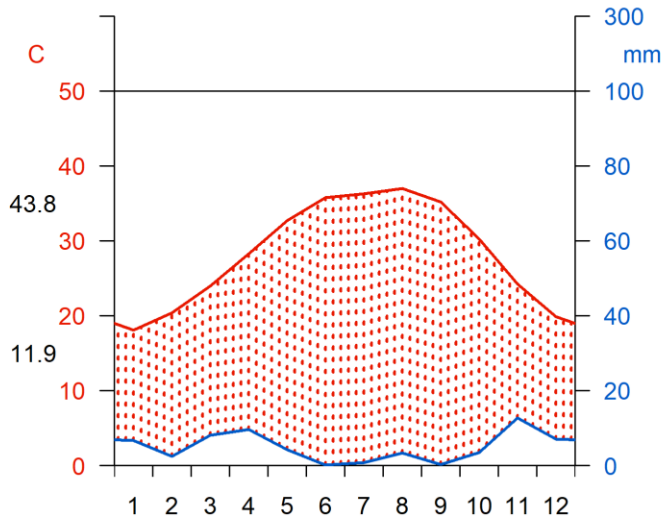**(d)**

Tabuk [Lat: 28.37, Lon: 36.60] (768 m)  
1989 to 2017 22.4C 32 mm

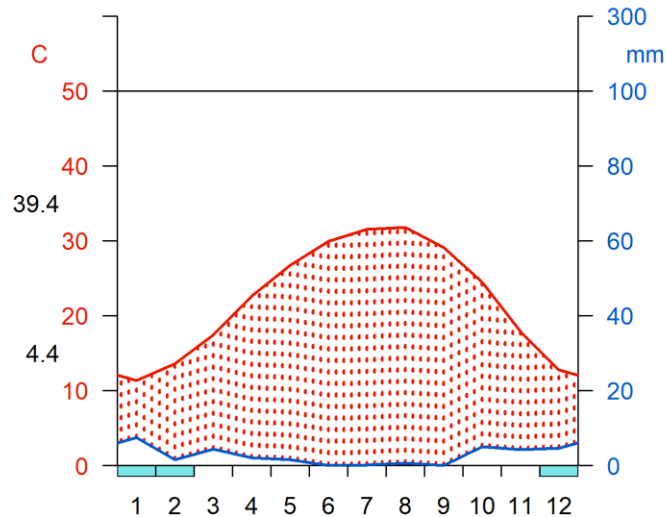**(e)**

Yanbu [Lat: 24.14, Lon: 38.06] (10 m)  
1989 to 2017 28.2C 34 mm

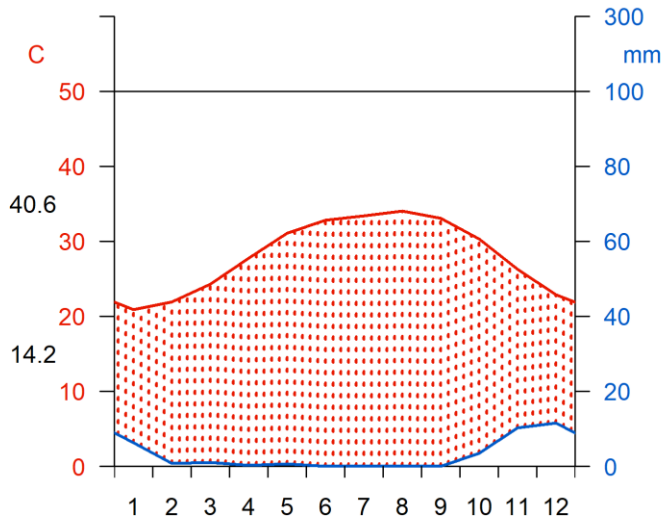

Supplement: s1 [file s1]
