# Supplementary figures and images for: Alien Plant Invasions of the Natural Habitat in the Western Region of Saudi Arabia: Floristic Diversity and Vegetation Structure
Source: MDPI journal article supplement (doi:10.3390/d15030309), 2023-02-21

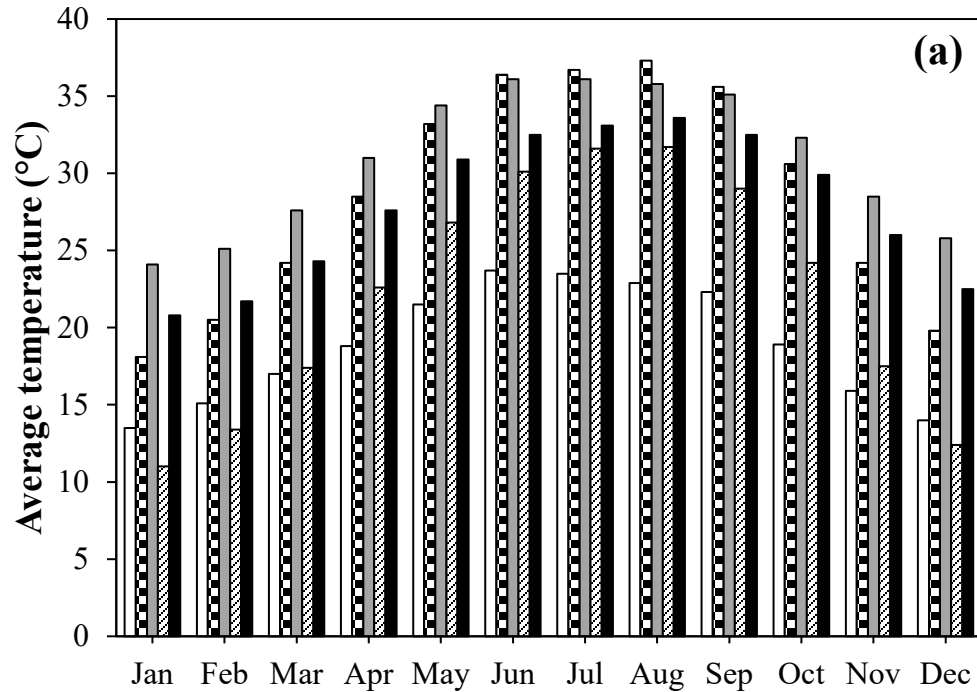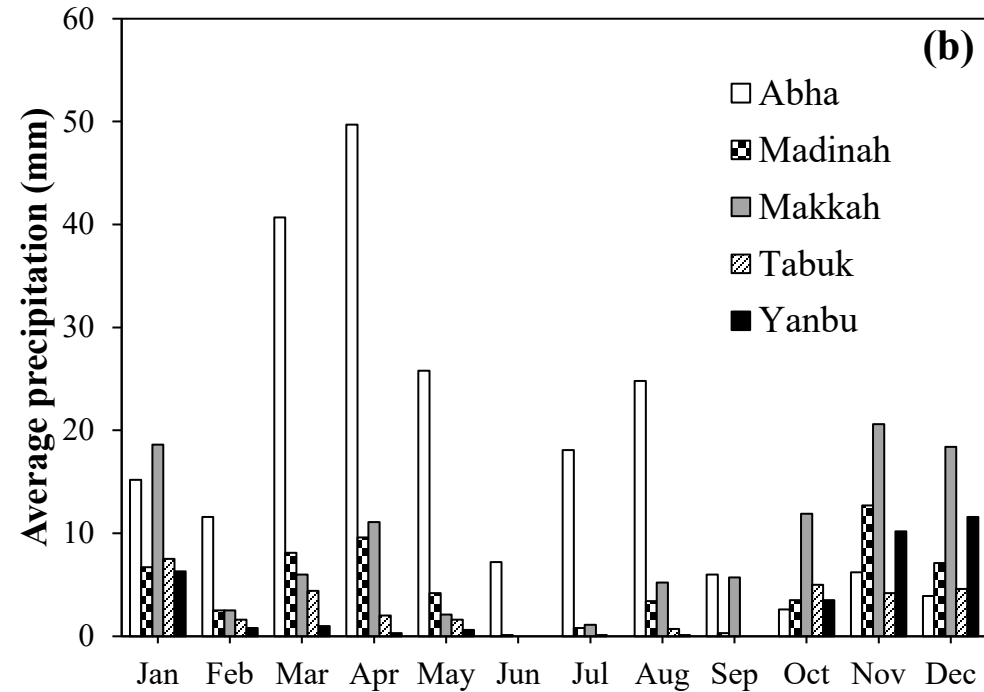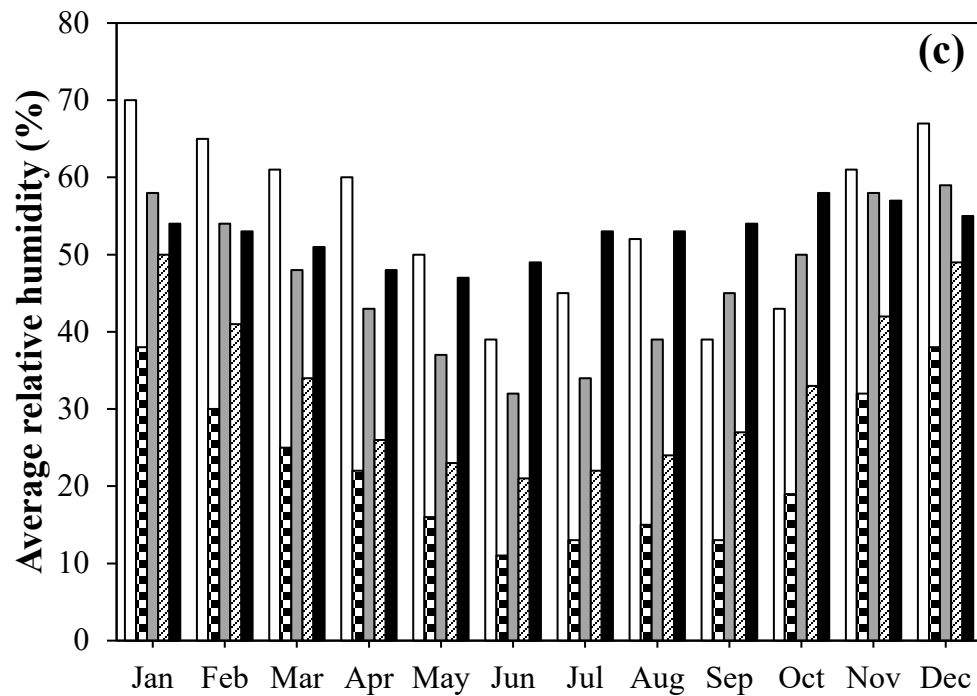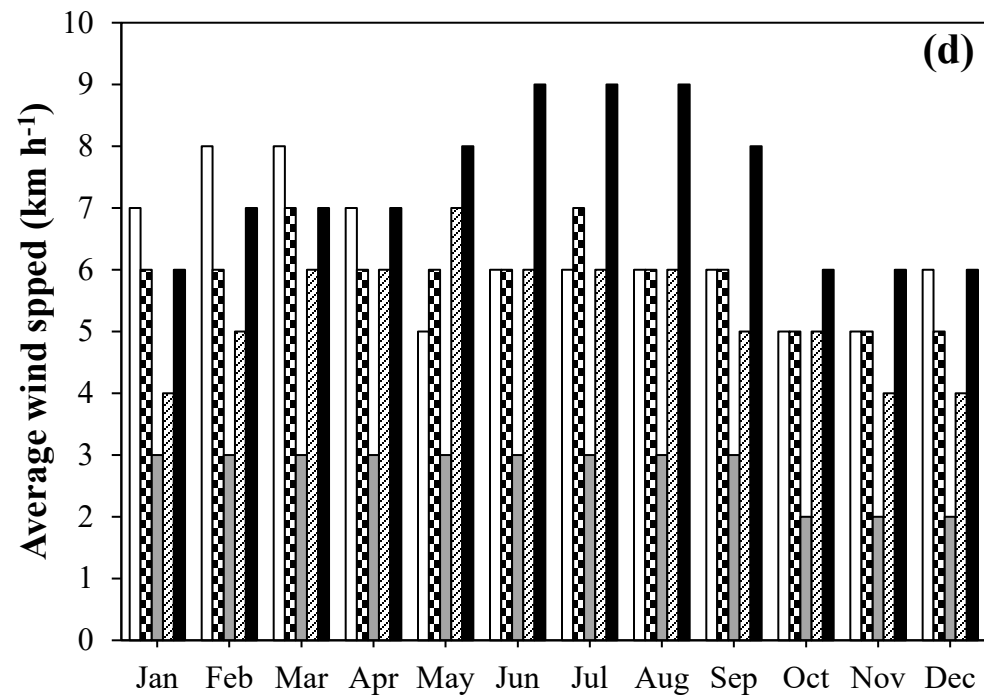

Supplement: s1 [file s1]
